# Supplementary material for: Effects of Two Natural Bisbenzylisoquinolines, Curine and Guattegaumerine, Extracted from Isolona hexaloba on Rhodamine Efflux by Abcb1b from Rat Glycocholic-Acid-Resistant Hepatocarcinoma Cells
Source: MDPI journal article supplement (doi:10.3390/molecules27093030), 2022-05-09

# Supplementary data

## Curine (A)

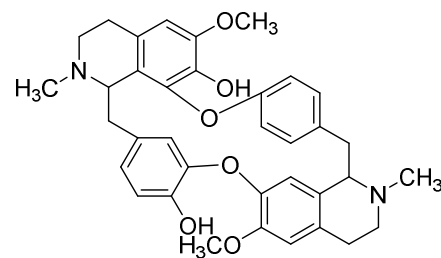

## Curine - $^{13}\text{C}$ NMR (125 MHz, $\text{CDCl}_3$ )

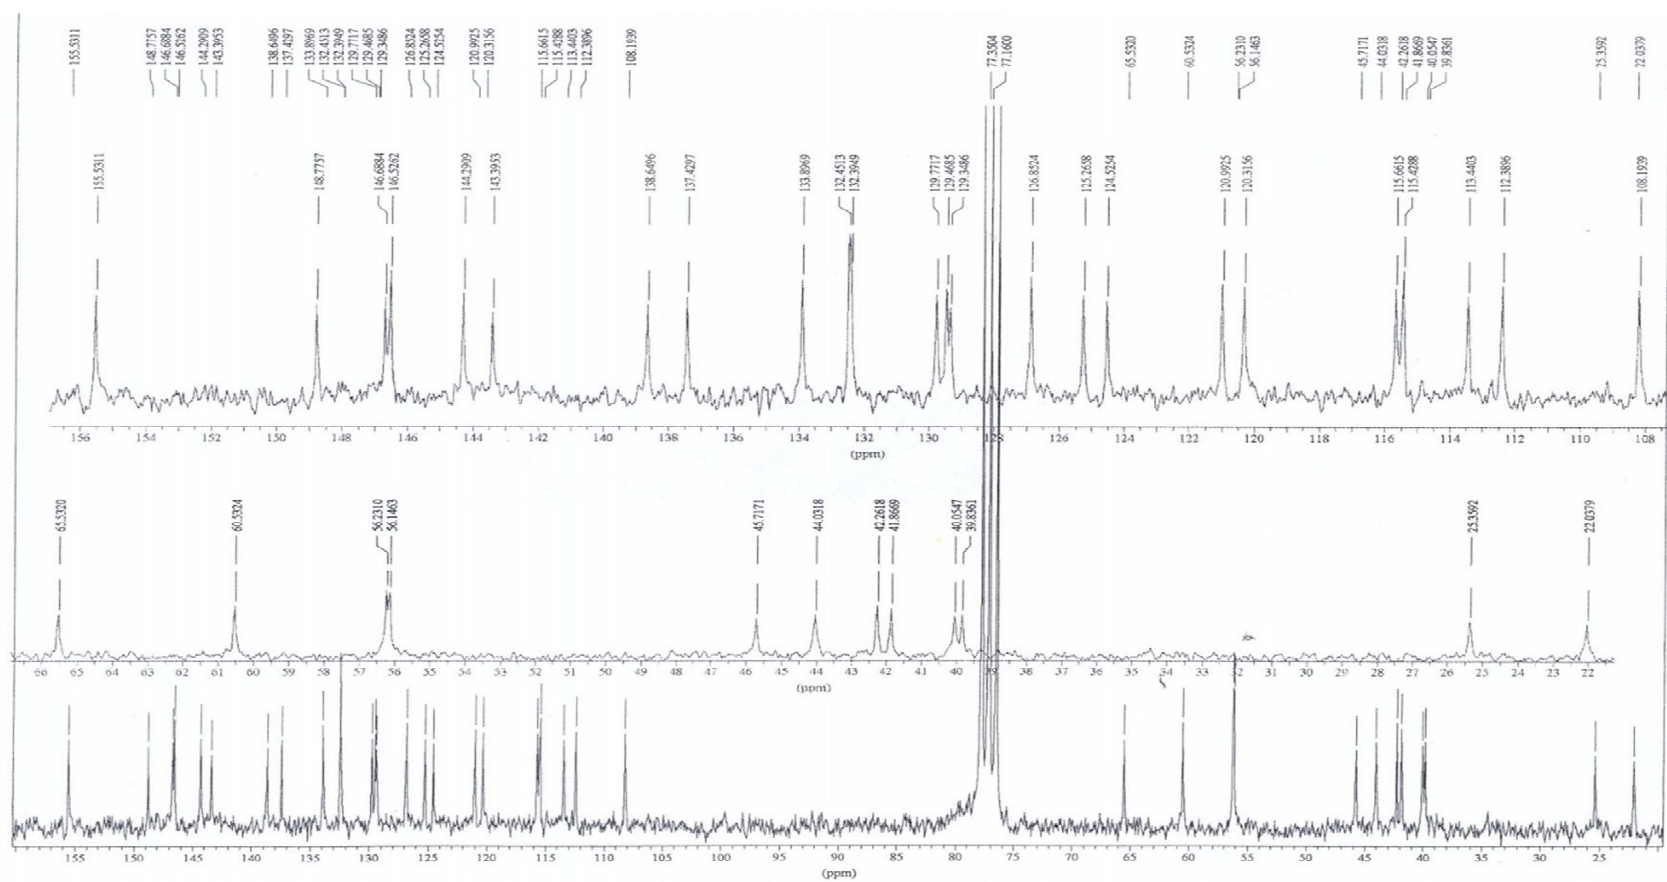

Curine -  $^{13}\text{C}$  NMR (125 MHz,  $\text{CDCl}_3$ ) and DEPT 135°

Curine      Zone (0 – 70 ppm)

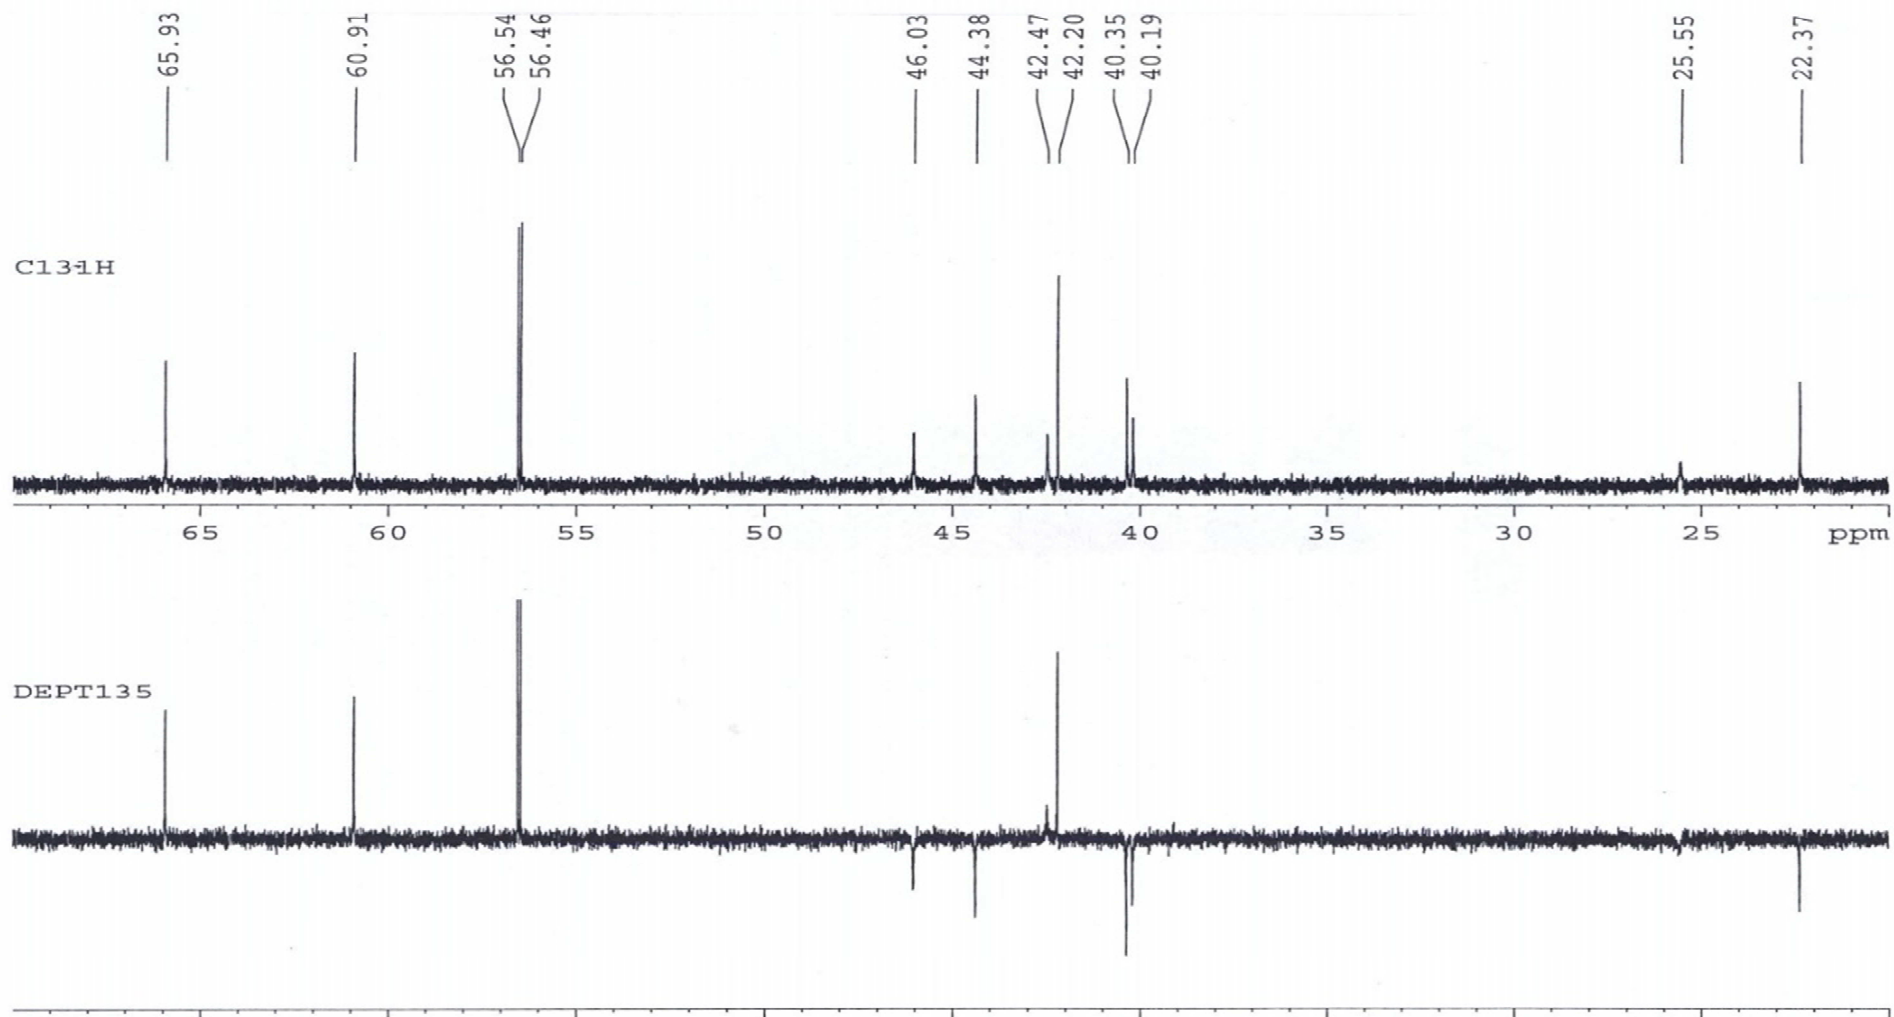

Curine

Zone (100-160 ppm)

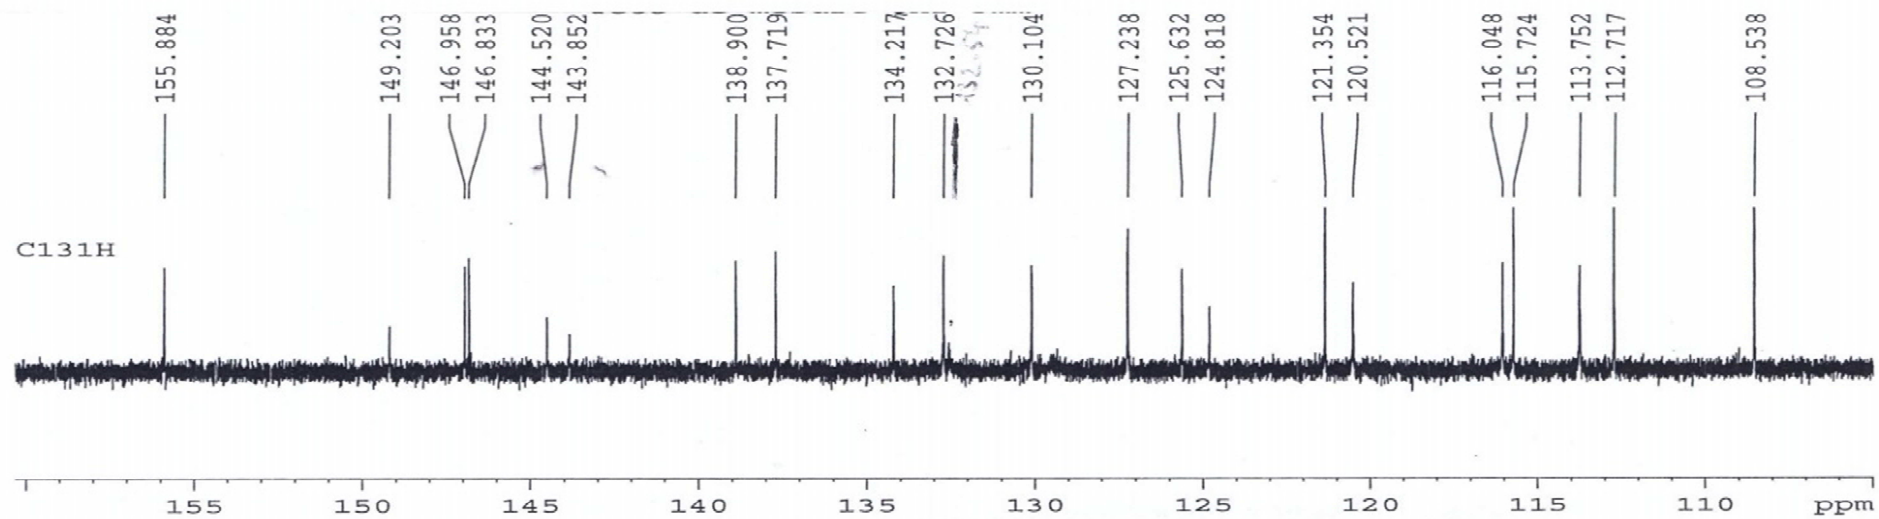

DEPT135

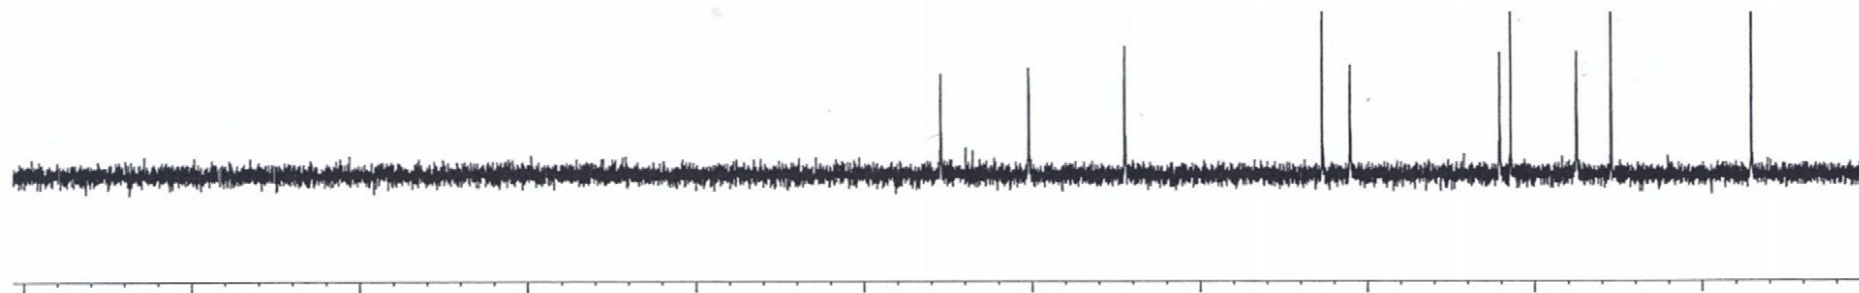

**Curine** -  $^{13}\text{C}$  -  $^1\text{H}$  correlations in HSQC NMR,  $\text{CDCl}_3$

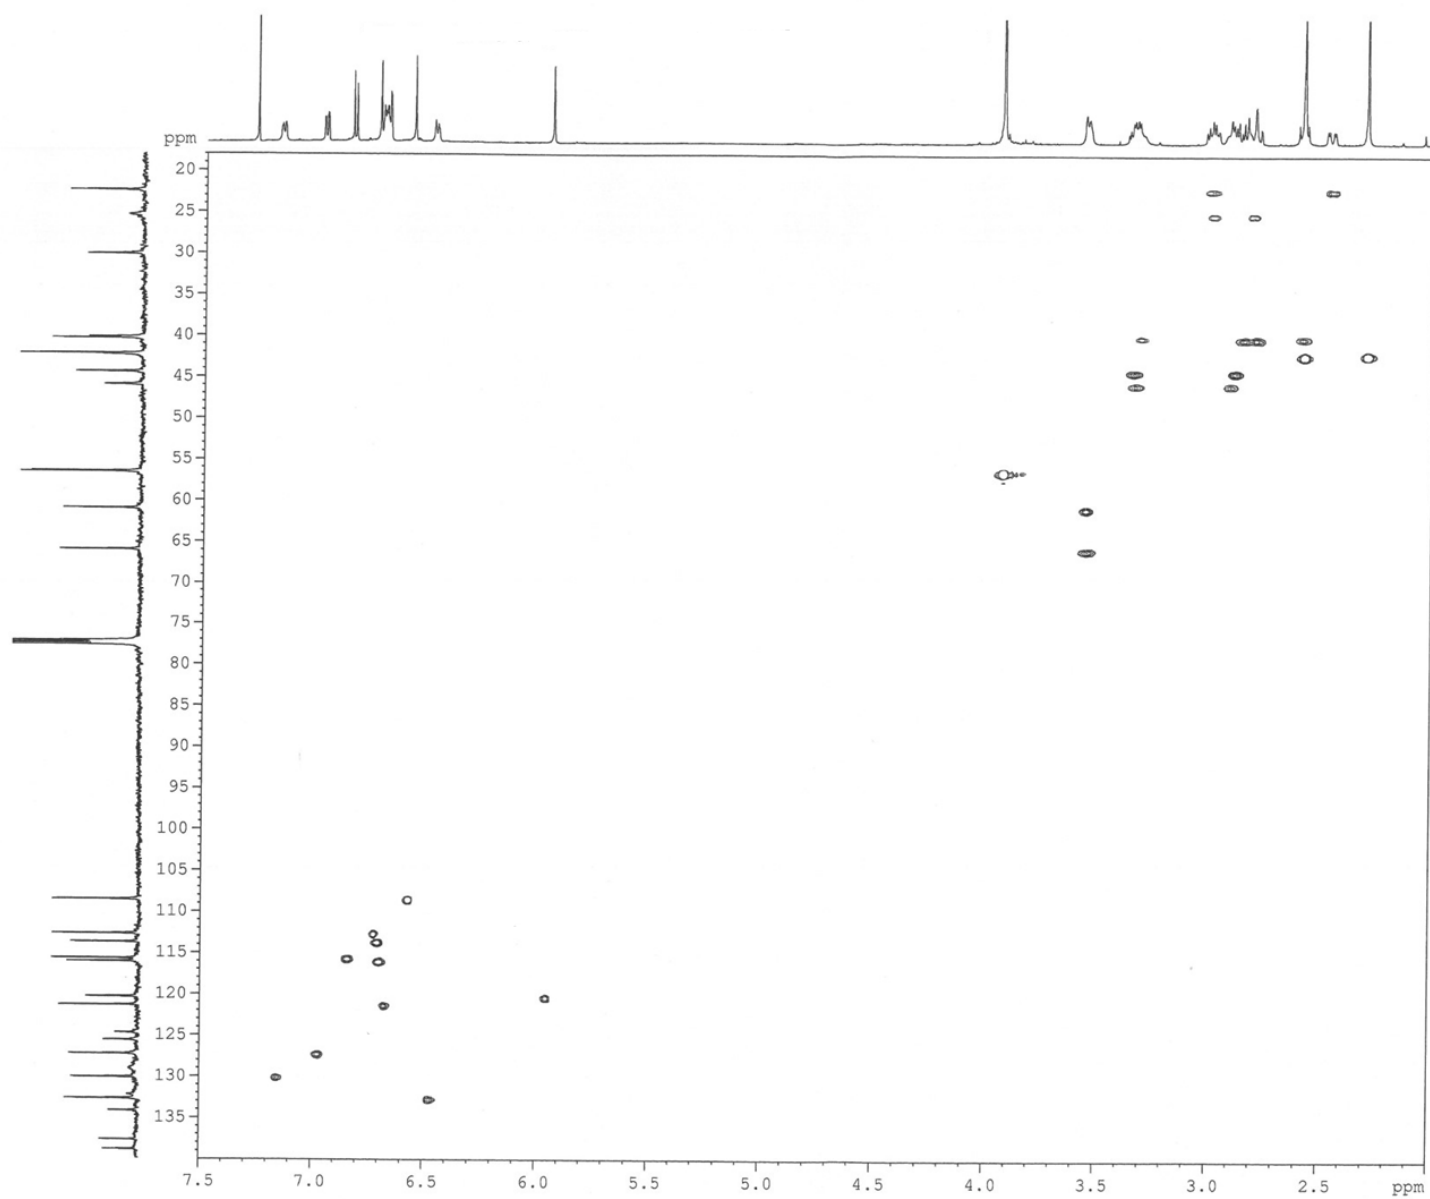



## Guattegaumerine (B)

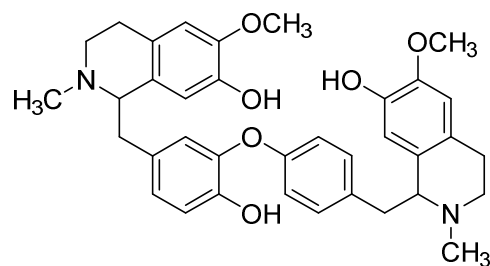

Guattegaumerine -  $^1\text{H}$  NMR (500 MHz,  $\text{CDCl}_3$ )

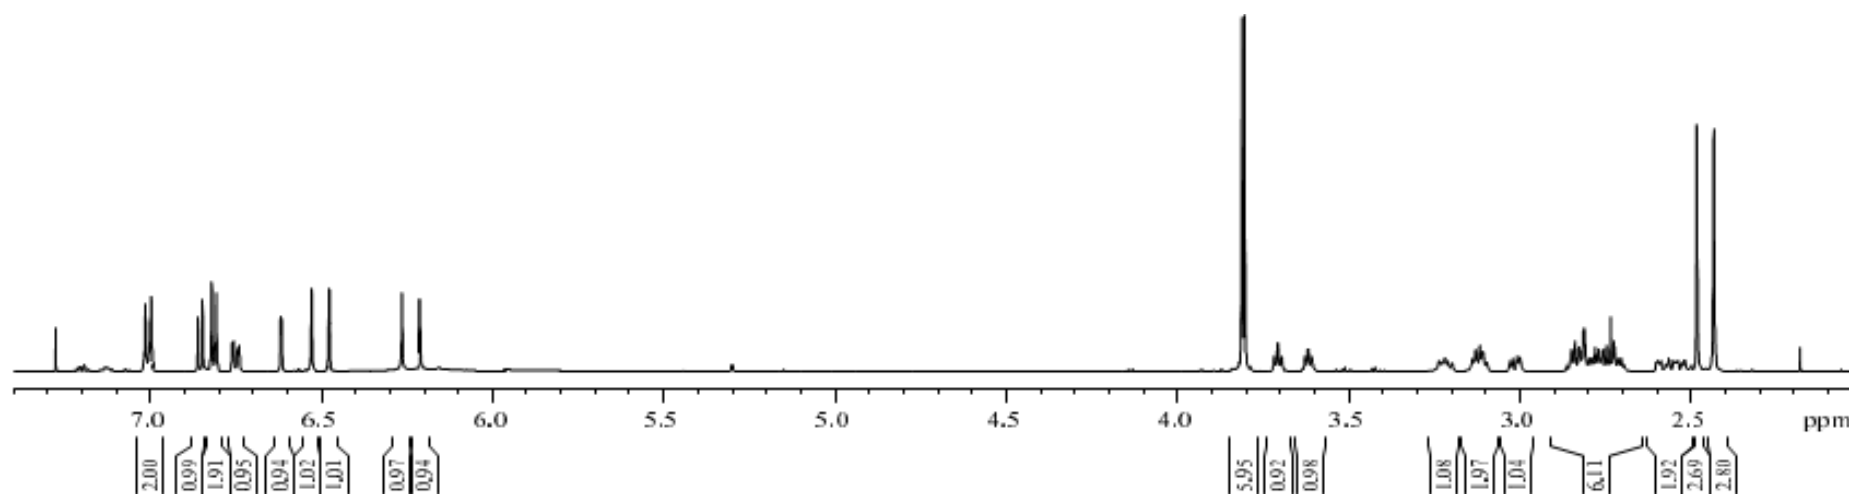

**Guattegaumerine -  $^{13}\text{C}$  NMR (125 MHz,  $\text{CDCl}_3$ )**

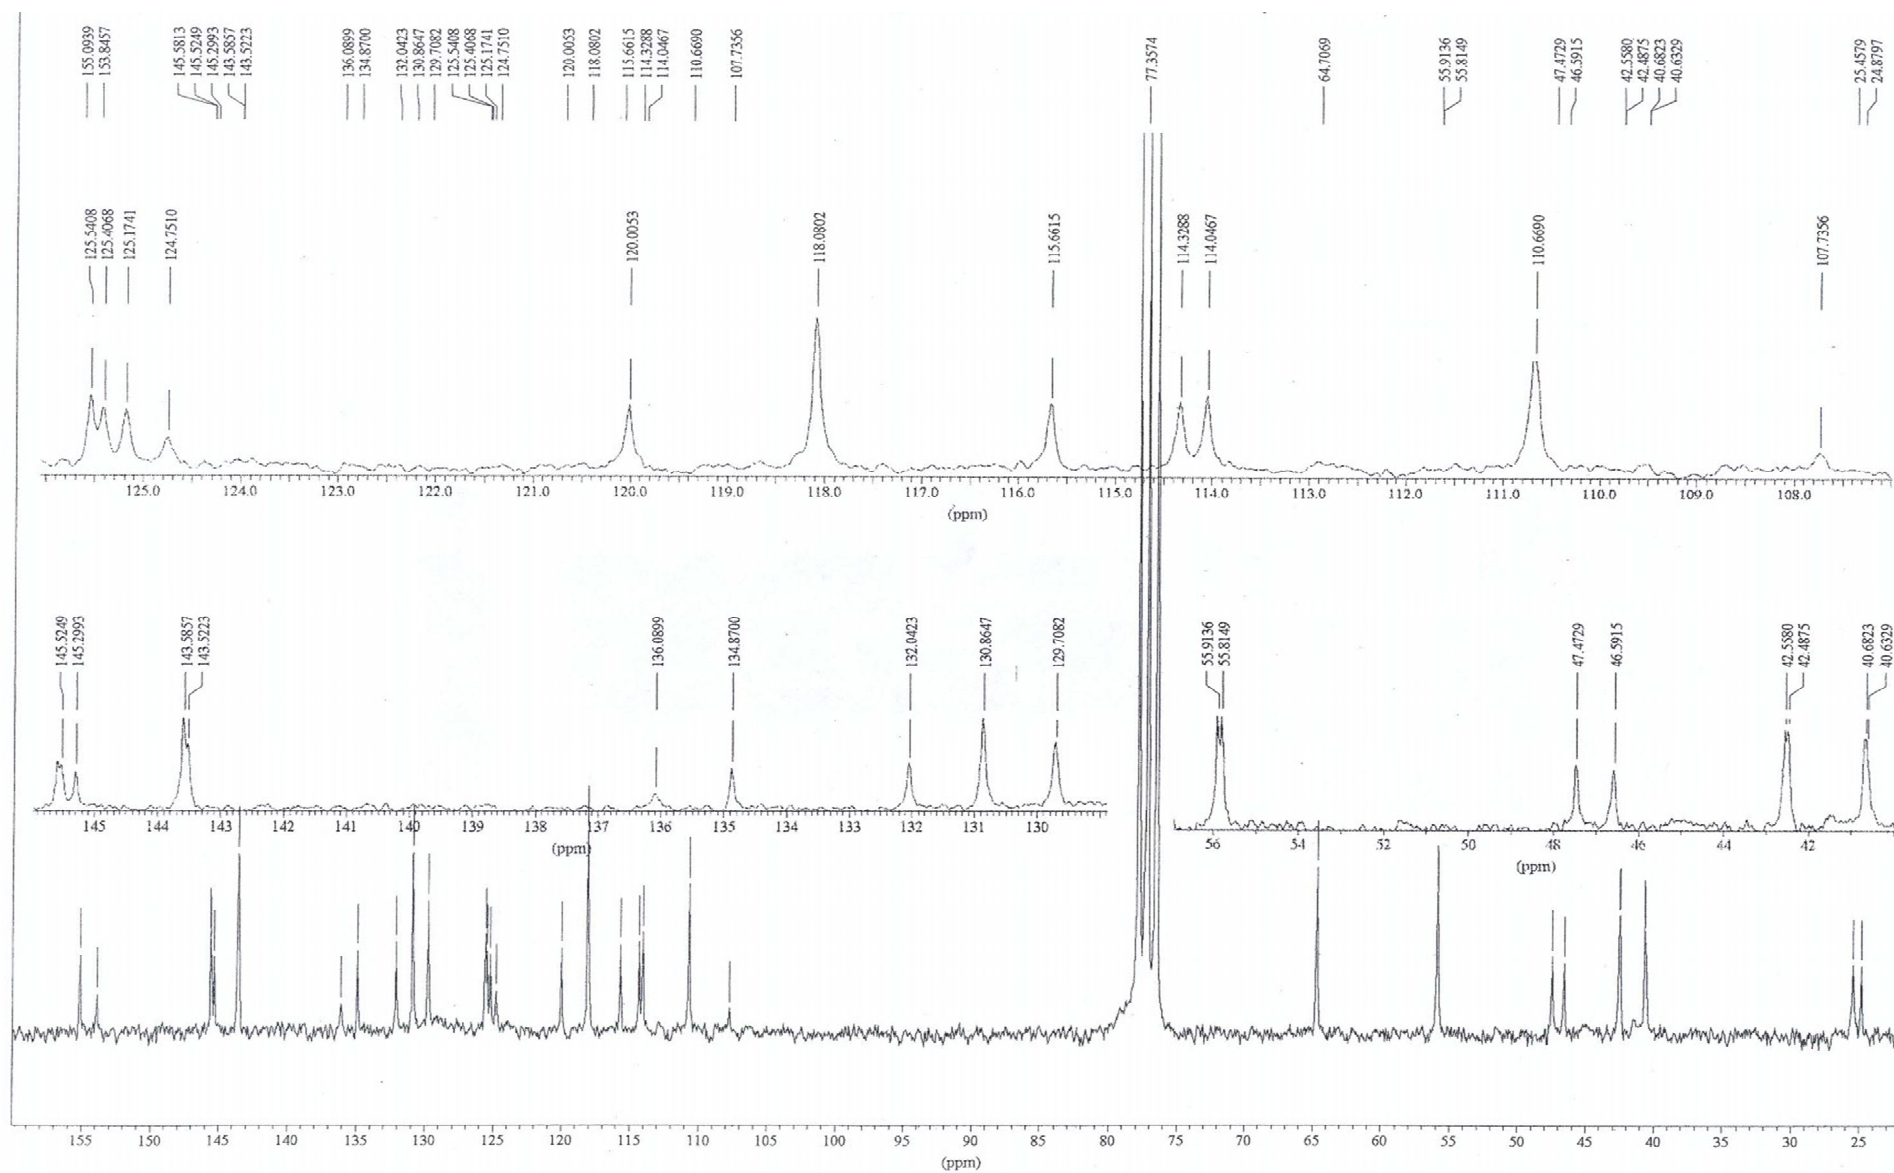

## Triacetylguattegaumerine (C)

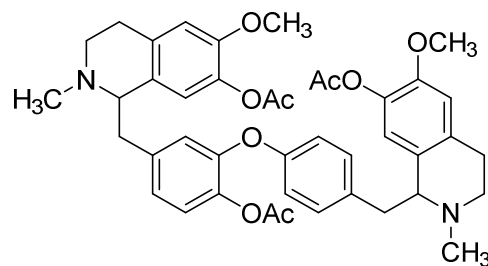

Triacetylguattegaumerine  $^1\text{H}$ -NMR (500MHz,  $\text{CDCl}_3$ )

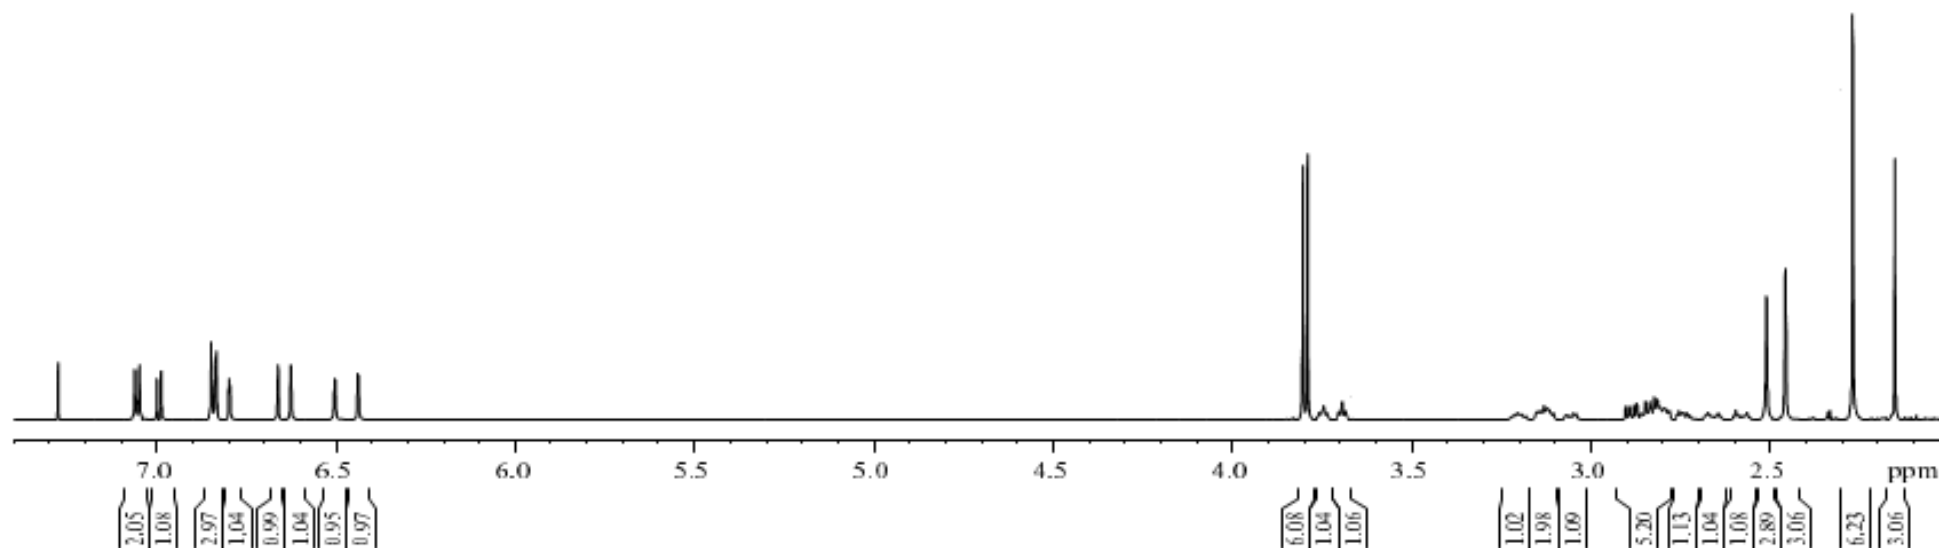

Triacetylguattegaumerine  $^{13}\text{C}$ -NMR (125MHz,  $\text{CDCl}_3$ ) and DEPT 135°

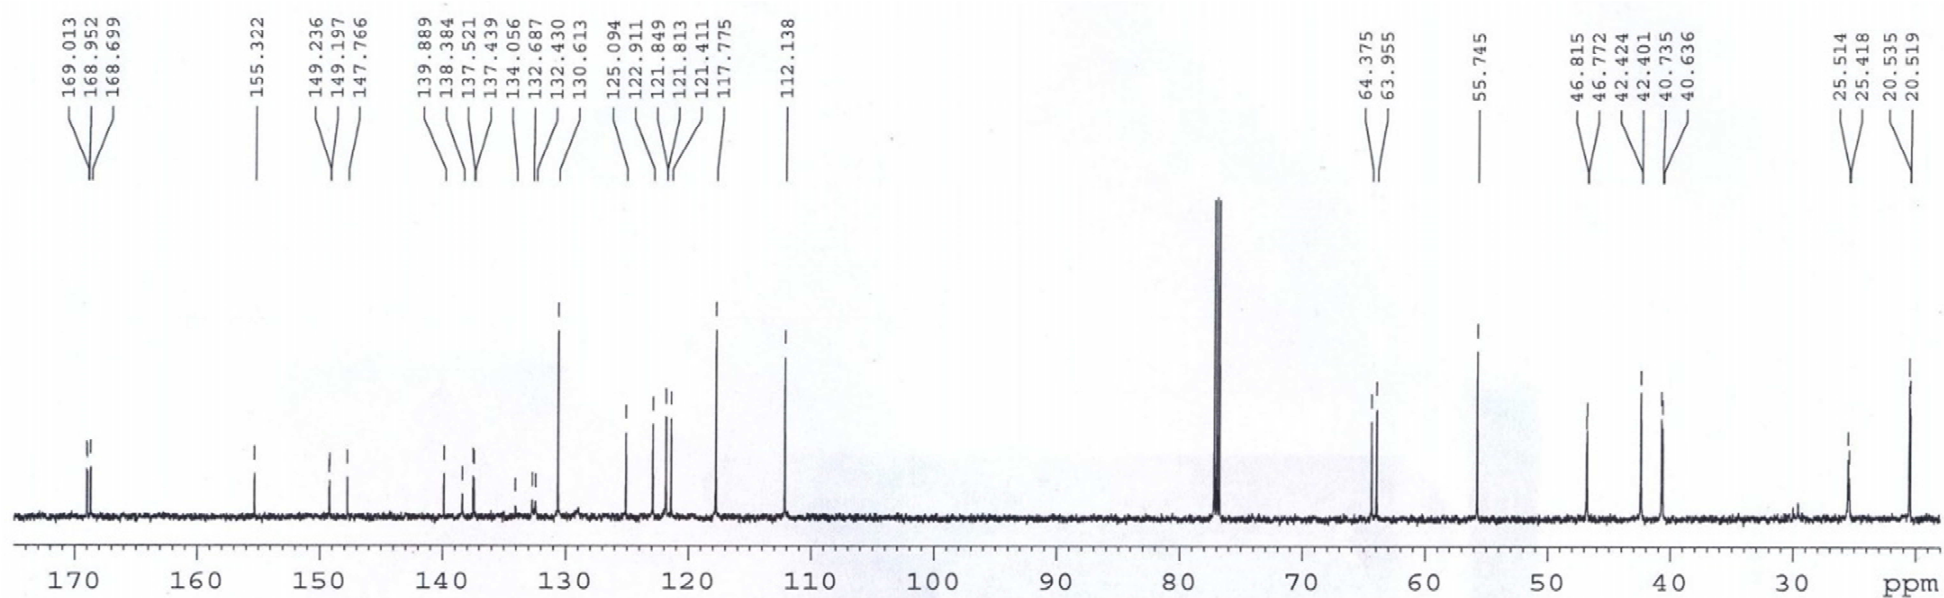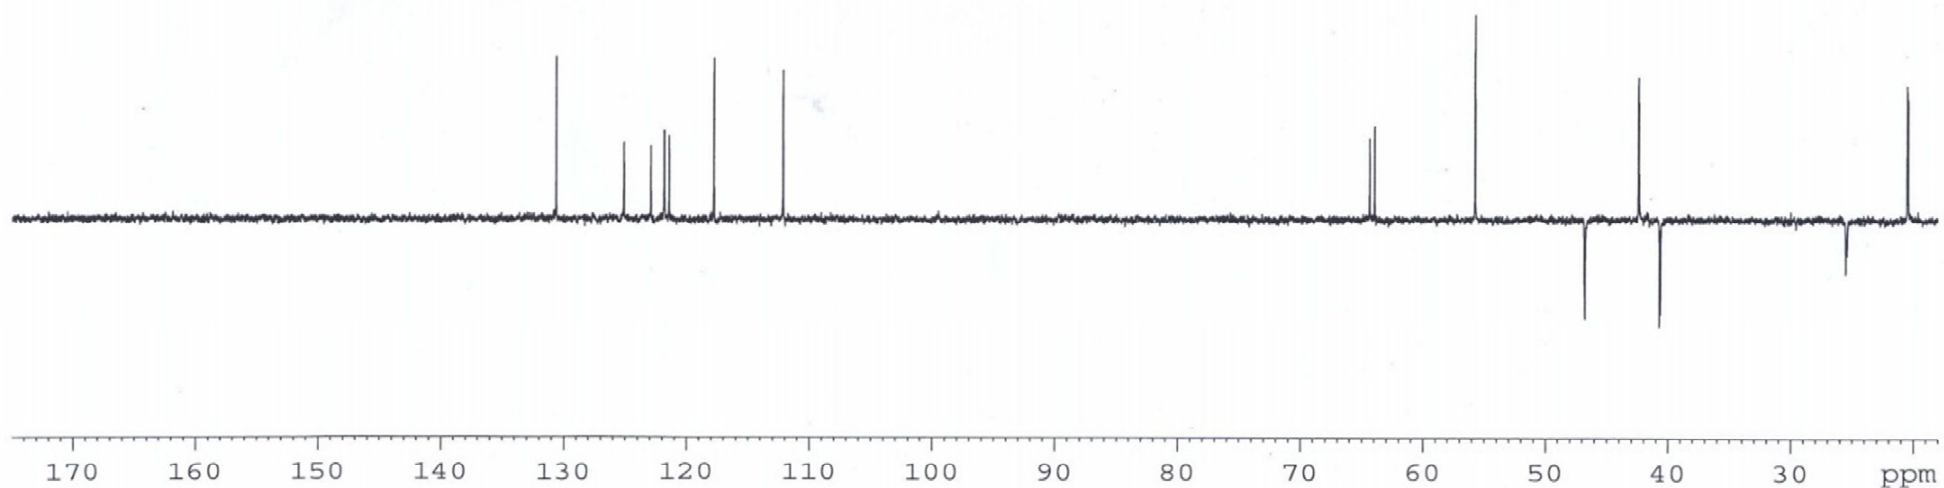

Supplement: s1 [file s1]
